# Supplementary material for: Evidence for Co-Evolution between Human MicroRNAs and Alu-Repeats
Source: PubMed Central journal article supplement (PMC2637760; doi:10.1371/journal.pone.0004456), 2009-02-11
Supplement: pone.0004456.s008.pdf [file pone.0004456.s008.pdf]

391  
hsa-mir-519b\_13/7  
hsa-mir-523\_13/7  
hsa-mir-518a-2\_13/7  
hsa-mir-519c\_13/7  
hsa-mir-525\_13/7  
hsa-mir-518b\_13/7  
hsa-mir-520a\_13/7  
hsa-mir-518f\_13/7  
hsa-mir-522\_13/7  
hsa-mir-526a-1\_13/7  
hsa-mir-518e\_13/7  
hsa-mir-516a-1\_13/7  
hsa-mir-527\_13/7  
hsa-mir-526a-2\_13/7  
hsa-mir-518d\_13/7  
hsa-mir-519a-2\_13/7  
hsa-mir-521-2\_13/7  
hsa-mir-516b-2\_13/7  
hsa-mir-519a-1\_13/7  
hsa-mir-520c\_58902519  
hsa-mir-518a-1\_13/7  
hsa-mir-521-1\_13/7  
hsa-mir-519a-2\_13/7  
hsa-mir-520b\_13/7  
hsa-mir-519e\_13/7  
hsa-mir-518c\_13/7  
hsa-mir-520g\_13/7  
hsa-mir-519d\_13/7  
hsa-mir-520h\_13/7  
hsa-mir-516b-1\_13/7  
hsa-mir-526b\_13/7  
hsa-mir-520d\_13/7  
hsa-mir-516a-2\_13/7  
hsa-mir-524\_13/7  
hsa-mir-520f\_13/7  
hsa-mir-520e\_13/7  
hsa-mir-517a\_13/7  
hsa-mir-517b\_13/7  
hsa-mir-517c\_13/7

521  
hsa-mir-519b\_13/7  
hsa-mir-523\_13/7  
hsa-mir-518a-2\_13/7  
hsa-mir-519c\_13/7  
hsa-mir-525\_13/7  
hsa-mir-518b\_13/7  
hsa-mir-520a\_13/7  
hsa-mir-518f\_13/7  
hsa-mir-522\_13/7  
hsa-mir-526a-1\_13/7  
hsa-mir-518e\_13/7  
hsa-mir-516a-1\_13/7  
hsa-mir-527\_13/7  
hsa-mir-526a-2\_13/7  
hsa-mir-518d\_13/7  
hsa-mir-521-2\_13/7  
hsa-mir-516b-2\_13/7  
hsa-mir-519a-2\_13/7  
hsa-mir-520c\_58902519  
hsa-mir-518a-1\_13/7  
hsa-mir-521-1\_13/7  
hsa-mir-519a-2\_13/7  
hsa-mir-520b\_13/7  
hsa-mir-519e\_13/7  
hsa-mir-518c\_13/7  
hsa-mir-520g\_13/7  
hsa-mir-519d\_13/7  
hsa-mir-520h\_13/7  
hsa-mir-516b-1\_13/7  
hsa-mir-526b\_13/7  
hsa-mir-520d\_13/7  
hsa-mir-516a-2\_13/7  
hsa-mir-524\_13/7  
hsa-mir-520f\_13/7  
hsa-mir-520e\_13/7  
hsa-mir-517a\_13/7  
hsa-mir-517b\_13/7  
hsa-mir-517c\_13/7

651  
hsa-mir-519b\_13/7  
hsa-mir-523\_13/7  
hsa-mir-518a-2\_13/7  
hsa-mir-519c\_13/7  
hsa-mir-525\_13/7  
hsa-mir-518b\_13/7  
hsa-mir-520a\_13/7  
hsa-mir-518f\_13/7  
hsa-mir-522\_13/7  
hsa-mir-526a-1\_13/7  
hsa-mir-518e\_13/7  
hsa-mir-516a-1\_13/7  
hsa-mir-527\_13/7  
hsa-mir-526a-2\_13/7  
hsa-mir-518d\_13/7  
hsa-mir-521-2\_13/7  
hsa-mir-516b-2\_13/7  
hsa-mir-519a-2\_13/7  
hsa-mir-520c\_58902519  
hsa-mir-518a-1\_13/7  
hsa-mir-521-1\_13/7  
hsa-mir-519a-2\_13/7  
hsa-mir-520b\_13/7  
hsa-mir-519e\_13/7  
hsa-mir-518c\_13/7  
hsa-mir-520g\_13/7  
hsa-mir-519d\_13/7  
hsa-mir-520h\_13/7  
hsa-mir-516b-1\_13/7  
hsa-mir-526b\_13/7  
hsa-mir-520d\_13/7  
hsa-mir-516a-2\_13/7  
hsa-mir-524\_13/7  
hsa-mir-520f\_13/7  
hsa-mir-520e\_13/7  
hsa-mir-517a\_13/7  
hsa-mir-517b\_13/7  
hsa-mir-517c\_13/7

hsa-mir-519b\_13/7 781  
hsa-mir-523\_13/7  
hsa-mir-518a-2\_13/7  
hsa-mir-519c\_13/7  
hsa-mir-525\_13/7  
hsa-mir-518b\_13/7  
hsa-mir-520a\_13/7  
hsa-mir-518f\_13/7  
hsa-mir-522\_13/7  
hsa-mir-520a-1\_13/7  
hsa-mir-518e\_13/7  
hsa-mir-516a-1\_13/7  
hsa-mir-527\_13/7  
hsa-mir-526a-2\_13/7  
hsa-mir-518d\_13/7  
hsa-mir-519a-2\_13/7  
hsa-mir-516b-2\_13/7  
hsa-mir-519a-1\_13/7  
hsa-mir-520c\_58902519  
hsa-mir-518a-1\_13/7  
hsa-mir-521-1\_13/7  
hsa-mir-519a-1\_13/7  
hsa-mir-520b\_13/7  
hsa-mir-519e\_13/7  
hsa-mir-518c\_13/7  
hsa-mir-520g\_13/7  
hsa-mir-519d\_13/7  
hsa-mir-520h\_13/7  
hsa-mir-516b-1\_13/7  
hsa-mir-526b\_13/7  
hsa-mir-520d\_13/7  
hsa-mir-516a-2\_13/7  
hsa-mir-524\_13/7  
hsa-mir-520f\_13/7  
hsa-mir-520e\_13/7  
hsa-mir-517a\_13/7  
hsa-mir-517b\_13/7  
hsa-mir-517c\_13/7

hsa-mir-519b\_13/7 911  
hsa-mir-523\_13/7  
hsa-mir-518a-2\_13/7  
hsa-mir-519e\_13/7  
hsa-mir-525\_13/7  
hsa-mir-518b\_13/7  
hsa-mir-520a\_13/7  
hsa-mir-518f\_13/7  
hsa-mir-522\_13/7  
hsa-mir-526a-1\_13/7  
hsa-mir-518e\_13/7  
hsa-mir-516a-1\_13/7  
hsa-mir-527\_13/7  
hsa-mir-526a-2\_13/7  
hsa-mir-518d\_13/7  
hsa-mir-521-2\_13/7  
hsa-mir-516b-2\_13/7  
hsa-mir-519a-1\_13/7  
hsa-mir-520c\_58902519  
hsa-mir-518a-1\_13/7  
hsa-mir-521-1\_13/7  
hsa-mir-519a-2\_13/7  
hsa-mir-520b\_13/7  
hsa-mir-519e\_13/7  
hsa-mir-518c\_13/7  
hsa-mir-520g\_13/7  
hsa-mir-519d\_13/7  
hsa-mir-520h\_13/7  
hsa-mir-516b-1\_13/7  
hsa-mir-526b\_13/7  
hsa-mir-520d\_13/7  
hsa-mir-516a-2\_13/7  
hsa-mir-524\_13/7  
hsa-mir-520f\_13/7  
hsa-mir-520e\_13/7  
hsa-mir-517a\_13/7  
hsa-mir-517b\_13/7  
hsa-mir-517c\_13/7

hsa-mir-519b\_13/7 1041  
hsa-mir-523\_13/7  
hsa-mir-518a-2\_13/7  
hsa-mir-519e\_13/7  
hsa-mir-525\_13/7  
hsa-mir-518b\_13/7  
hsa-mir-520a\_13/7  
hsa-mir-518f\_13/7  
hsa-mir-522\_13/7  
hsa-mir-526a-1\_13/7  
hsa-mir-518e\_13/7  
hsa-mir-516a-1\_13/7  
hsa-mir-527\_13/7  
hsa-mir-526a-2\_13/7  
hsa-mir-518d\_13/7  
hsa-mir-521-2\_13/7  
hsa-mir-516b-2\_13/7  
hsa-mir-519a-1\_13/7  
hsa-mir-520c\_58902519  
hsa-mir-518a-1\_13/7  
hsa-mir-521-1\_13/7  
hsa-mir-519a-2\_13/7  
hsa-mir-520b\_13/7  
hsa-mir-519e\_13/7  
hsa-mir-518c\_13/7  
hsa-mir-520g\_13/7  
hsa-mir-519d\_13/7  
hsa-mir-520h\_13/7  
hsa-mir-516b-1\_13/7  
hsa-mir-526b\_13/7  
hsa-mir-520d\_13/7  
hsa-mir-516a-2\_13/7  
hsa-mir-524\_13/7  
hsa-mir-520f\_13/7  
hsa-mir-520e\_13/7  
hsa-mir-517a\_13/7  
hsa-mir-517b\_13/7  
hsa-mir-517c\_13/7

1171

```

hsa-mir-519b_13/7
hsa-mir-523_13/7
hsa-mir-518a-2_13/7
hsa-mir-519c_13/7
hsa-mir-525_13/7
hsa-mir-518b_13/7
hsa-mir-520a_13/7
hsa-mir-518f_13/7
hsa-mir-522_13/7
hsa-mir-526a-1_13/7
hsa-mir-518e_13/7
hsa-mir-516a-1_13/7
hsa-mir-527_13/7
hsa-mir-526a-2_13/7
hsa-mir-518d_13/7
hsa-mir-521_2_13/7
hsa-mir-516b-2_13/7
hsa-mir-519a-1_13/7
hsa-mir-520c_58902519
hsa-mir-518a-1_13/7
hsa-mir-521-1_13/7
hsa-mir-519a-2_13/7
hsa-mir-520b_13/7
hsa-mir-519e_13/7
hsa-mir-518c_13/7
hsa-mir-520g_13/7
hsa-mir-519d_13/7
hsa-mir-520h_13/7
hsa-mir-516b-1_13/7
hsa-mir-526b_13/7
hsa-mir-520d_13/7
hsa-mir-516a-2_13/7
hsa-mir-524_13/7
hsa-mir-520f_13/7
hsa-mir-520e_13/7
hsa-mir-517a_13/7
hsa-mir-517b_13/7
hsa-mir-517c_13/7

```

1301

```

hsa-mir-519b_13/7
hsa-mir-523_13/7
hsa-mir-518a-2_13/7
hsa-mir-519c_13/7
hsa-mir-525_13/7
hsa-mir-518b_13/7
hsa-mir-520a_13/7
hsa-mir-518f_13/7
hsa-mir-522_13/7
hsa-mir-526a-1_13/7
hsa-mir-518e_13/7
hsa-mir-516a-1_13/7
hsa-mir-527_13/7
hsa-mir-526a-2_13/7
hsa-mir-518d_13/7
hsa-mir-521-2_13/7
hsa-mir-516b-2_13/7
hsa-mir-519a-1_13/7
hsa-mir-520c_58902519
hsa-mir-518a-1_13/7
hsa-mir-521-1_13/7
hsa-mir-519a-2_13/7
hsa-mir-520b_13/7
hsa-mir-519e_13/7
hsa-mir-518c_13/7
hsa-mir-520g_13/7
hsa-mir-519d_13/7
hsa-mir-520h_13/7
hsa-mir-516b-1_13/7
hsa-mir-526b_13/7
hsa-mir-520d_13/7
hsa-mir-516a-2_13/7
hsa-mir-524_13/7
hsa-mir-520f_13/7
hsa-mir-520e_13/7
hsa-mir-517a_13/7
hsa-mir-517b_13/7
hsa-mir-517c_13/7

```

1431

```

hsa-mir-519b_13/7
hsa-mir-523_13/7
hsa-mir-518a-2_13/7
hsa-mir-519c_13/7
hsa-mir-525_13/7
hsa-mir-518b_13/7
hsa-mir-520a_13/7
hsa-mir-518f_13/7
hsa-mir-522_13/7
hsa-mir-526a-1_13/7
hsa-mir-518e_13/7
hsa-mir-516a-1_13/7
hsa-mir-527_13/7
hsa-mir-526a-2_13/7
hsa-mir-518d_13/7
hsa-mir-521-2_13/7
hsa-mir-516b-2_13/7
hsa-mir-519a-1_13/7
hsa-mir-520c_58902519
hsa-mir-518a-1_13/7
hsa-mir-521-1_13/7
hsa-mir-519a-2_13/7
hsa-mir-520b_13/7
hsa-mir-519e_13/7
hsa-mir-518c_13/7
hsa-mir-520g_13/7
hsa-mir-519d_13/7
hsa-mir-520h_13/7
hsa-mir-516b-1_13/7
hsa-mir-526b_13/7
hsa-mir-520d_13/7
hsa-mir-516a-2_13/7
hsa-mir-524_13/7
hsa-mir-520f_13/7
hsa-mir-520e_13/7
hsa-mir-517a_13/7
hsa-mir-517b_13/7
hsa-mir-517c_13/7

```

1561  
hsa-mir-519b\_13/7  
hsa-mir-523\_13/7  
hsa-mir-518a-2\_13/7  
hsa-mir-519c\_13/7  
hsa-mir-525\_13/7  
hsa-mir-518b\_13/7  
hsa-mir-520a\_13/7  
hsa-mir-518f\_13/7  
hsa-mir-522\_13/7  
hsa-mir-526a-1\_13/7  
hsa-mir-518e\_13/7  
hsa-mir-516a-1\_13/7  
hsa-mir-527\_13/7  
hsa-mir-526a-2\_13/7  
hsa-mir-518d\_13/7  
hsa-mir-521-2\_13/7  
hsa-mir-516b-2\_13/7  
hsa-mir-519a-1\_13/7  
hsa-mir-520c\_58902519  
hsa-mir-518a-1\_13/7  
hsa-mir-521-1\_13/7  
hsa-mir-519a-2\_13/7  
hsa-mir-520b\_13/7  
hsa-mir-519e\_13/7  
hsa-mir-518c\_13/7  
hsa-mir-520g\_13/7  
hsa-mir-519d\_13/7  
hsa-mir-520h\_13/7  
hsa-mir-516b-1\_13/7  
hsa-mir-526b\_13/7  
hsa-mir-520d\_13/7  
hsa-mir-516a-2\_13/7  
hsa-mir-524\_13/7  
hsa-mir-520f\_13/7  
hsa-mir-520e\_13/7  
hsa-mir-517a\_13/7  
hsa-mir-517b\_13/7  
hsa-mir-517c\_13/7

1691  
hsa-mir-519b\_13/7  
hsa-mir-523\_13/7  
hsa-mir-518a-2\_13/7  
hsa-mir-519c\_13/7  
hsa-mir-525\_13/7  
hsa-mir-518b\_13/7  
hsa-mir-520a\_13/7  
hsa-mir-518f\_13/7  
hsa-mir-522\_13/7  
hsa-mir-526a-1\_13/7  
hsa-mir-518e\_13/7  
hsa-mir-527\_13/7  
hsa-mir-526a-2\_13/7  
hsa-mir-518d\_13/7  
hsa-mir-521-2\_13/7  
hsa-mir-516b-2\_13/7  
hsa-mir-519a-1\_13/7  
hsa-mir-520c\_58902519  
hsa-mir-518a-1\_13/7  
hsa-mir-521-1\_13/7  
hsa-mir-519a-2\_13/7  
hsa-mir-520b\_13/7  
hsa-mir-519e\_13/7  
hsa-mir-518c\_13/7  
hsa-mir-520g\_13/7  
hsa-mir-519d\_13/7  
hsa-mir-520h\_13/7  
hsa-mir-516b-1\_13/7  
hsa-mir-526b\_13/7  
hsa-mir-520d\_13/7  
hsa-mir-516a-2\_13/7  
hsa-mir-524\_13/7  
hsa-mir-520f\_13/7  
hsa-mir-520e\_13/7  
hsa-mir-517a\_13/7  
hsa-mir-517b\_13/7  
hsa-mir-517c\_13/7

1821  
hsa-mir-519b\_13/7  
hsa-mir-523\_13/7  
hsa-mir-518a-2\_13/7  
hsa-mir-519c\_13/7  
hsa-mir-525\_13/7  
hsa-mir-518b\_13/7  
hsa-mir-520a\_13/7  
hsa-mir-522\_13/7  
hsa-mir-526a-1\_13/7  
hsa-mir-518e\_13/7  
hsa-mir-516a-1\_13/7  
hsa-mir-527\_13/7  
hsa-mir-526a-2\_13/7  
hsa-mir-518d\_13/7  
hsa-mir-521-2\_13/7  
hsa-mir-516b-2\_13/7  
hsa-mir-519a-1\_13/7  
hsa-mir-520c\_58902519  
hsa-mir-518a-1\_13/7  
hsa-mir-521-1\_13/7  
hsa-mir-519a-2\_13/7  
hsa-mir-520b\_13/7  
hsa-mir-519e\_13/7  
hsa-mir-520g\_13/7  
hsa-mir-519d\_13/7  
hsa-mir-520h\_13/7  
hsa-mir-516b-1\_13/7  
hsa-mir-526b\_13/7  
hsa-mir-520d\_13/7  
hsa-mir-516a-2\_13/7  
hsa-mir-524\_13/7  
hsa-mir-520f\_13/7  
hsa-mir-520e\_13/7  
hsa-mir-517a\_13/7  
hsa-mir-517b\_13/7  
hsa-mir-517c\_13/7

1951  
hsa-mir-519b\_13/7  
hsa-mir-523\_13/7  
hsa-mir-518a-2\_13/7  
hsa-mir-519c\_13/7  
hsa-mir-525\_13/7  
hsa-mir-518b\_13/7  
hsa-mir-520a\_13/7  
hsa-mir-518f\_13/7  
hsa-mir-522\_13/7  
hsa-mir-526a-1\_13/7  
hsa-mir-518e\_13/7  
hsa-mir-516a-1\_13/7  
hsa-mir-527\_13/7  
hsa-mir-526a-2\_13/7  
hsa-mir-518d\_13/7  
hsa-mir-521-2\_13/7  
hsa-mir-516b-2\_13/7  
hsa-mir-519a-1\_13/7  
hsa-mir-520c\_58902519  
hsa-mir-518a-1\_13/7  
hsa-mir-521-1\_13/7  
hsa-mir-519a-2\_13/7  
hsa-mir-520b\_13/7  
hsa-mir-519e\_13/7  
hsa-mir-518c\_13/7  
hsa-mir-520g\_13/7  
hsa-mir-519d\_13/7  
hsa-mir-520h\_13/7  
hsa-mir-516b-1\_13/7  
hsa-mir-526b\_13/7  
hsa-mir-520d\_13/7  
hsa-mir-516a-2\_13/7  
hsa-mir-524\_13/7  
hsa-mir-520f\_13/7  
hsa-mir-520e\_13/7  
hsa-mir-517a\_13/7  
hsa-mir-517b\_13/7  
hsa-mir-517c\_13/7

2081  
hsa-mir-519b\_13/7  
hsa-mir-523\_13/7  
hsa-mir-518a-2\_13/7  
hsa-mir-519c\_13/7  
hsa-mir-525\_13/7  
hsa-mir-518b\_13/7  
hsa-mir-520a\_13/7  
hsa-mir-518f\_13/7  
hsa-mir-522\_13/7  
hsa-mir-526a-1\_13/7  
hsa-mir-518e\_13/7  
hsa-mir-516a-1\_13/7  
hsa-mir-527\_13/7  
hsa-mir-526a-2\_13/7  
hsa-mir-518d\_13/7  
hsa-mir-521-2\_13/7  
hsa-mir-516b-2\_13/7  
hsa-mir-519a-1\_13/7  
hsa-mir-520c\_58902519  
hsa-mir-518a-1\_13/7  
hsa-mir-521-1\_13/7  
hsa-mir-519a-2\_13/7  
hsa-mir-520b\_13/7  
hsa-mir-519e\_13/7  
hsa-mir-518c\_13/7  
hsa-mir-520g\_13/7  
hsa-mir-519d\_13/7  
hsa-mir-520h\_13/7  
hsa-mir-516b-1\_13/7  
hsa-mir-526b\_13/7  
hsa-mir-520d\_13/7  
hsa-mir-516a-2\_13/7  
hsa-mir-524\_13/7  
hsa-mir-520f\_13/7  
hsa-mir-520e\_13/7  
hsa-mir-517a\_13/7  
hsa-mir-517b\_13/7  
hsa-mir-517c\_13/7

2211  
hsa-mir-519b\_13/7  
hsa-mir-523\_13/7  
hsa-mir-518a-2\_13/7  
hsa-mir-519c\_13/7  
hsa-mir-525\_13/7  
hsa-mir-518b\_13/7  
hsa-mir-520a\_13/7  
hsa-mir-518f\_13/7  
hsa-mir-522\_13/7  
hsa-mir-526a-1\_13/7  
hsa-mir-518e\_13/7  
hsa-mir-516a-1\_13/7  
hsa-mir-527\_13/7  
hsa-mir-526a-2\_13/7  
hsa-mir-518d\_13/7  
hsa-mir-521-2\_13/7  
hsa-mir-516b-2\_13/7  
hsa-mir-519a-1\_13/7  
hsa-mir-520c\_58902519  
hsa-mir-518a-1\_13/7  
hsa-mir-521-1\_13/7  
hsa-mir-519a-2\_13/7  
hsa-mir-520b\_13/7  
hsa-mir-519e\_13/7  
hsa-mir-518c\_13/7  
hsa-mir-520g\_13/7  
hsa-mir-519d\_13/7  
hsa-mir-520h\_13/7  
hsa-mir-516b-1\_13/7  
hsa-mir-526b\_13/7  
hsa-mir-520d\_13/7  
hsa-mir-516a-2\_13/7  
hsa-mir-524\_13/7  
hsa-mir-520f\_13/7  
hsa-mir-520e\_13/7  
hsa-mir-517a\_13/7  
hsa-mir-517b\_13/7  
hsa-mir-517c\_13/7



hsa-mir-519b\_13/7 2731  
hsa-mir-523\_13/7  
hsa-mir-518a-2\_13/7  
hsa-mir-519c\_13/7  
hsa-mir-525\_13/7  
hsa-mir-518b\_13/7  
hsa-mir-520a\_13/7  
hsa-mir-518f\_13/7  
hsa-mir-522\_13/7  
hsa-mir-526a-1\_13/7  
hsa-mir-518g\_13/7  
hsa-mir-518e\_13/7  
hsa-mir-516a-1\_13/7  
hsa-mir-527\_13/7  
hsa-mir-526a-2\_13/7  
hsa-mir-518d\_13/7  
hsa-mir-521-2\_13/7  
hsa-mir-516b-2\_13/7  
hsa-mir-519a-1\_13/7  
hsa-mir-520c\_58902519  
hsa-mir-518a-1\_13/7  
hsa-mir-521-1\_13/7  
hsa-mir-519a-2\_13/7  
hsa-mir-520b\_13/7  
hsa-mir-519e\_13/7  
hsa-mir-518c\_13/7  
hsa-mir-520g\_13/7  
hsa-mir-519d\_13/7  
hsa-mir-520h\_13/7  
hsa-mir-516b-1\_13/7  
hsa-mir-526b\_13/7  
hsa-mir-520d\_13/7  
hsa-mir-516a-2\_13/7  
hsa-mir-524\_13/7  
hsa-mir-520f\_13/7  
hsa-mir-520e\_13/7  
hsa-mir-517a\_13/7  
hsa-mir-517b\_13/7  
hsa-mir-517c\_13/7

hsa-mir-519b\_13/7 2861  
hsa-mir-523\_13/7  
hsa-mir-518a-2\_13/7  
hsa-mir-519c\_13/7  
hsa-mir-525\_13/7  
hsa-mir-518b\_13/7  
hsa-mir-520a\_13/7  
hsa-mir-518f\_13/7  
hsa-mir-522\_13/7  
hsa-mir-526a-1\_13/7  
hsa-mir-518g\_13/7  
hsa-mir-516a-1\_13/7  
hsa-mir-527\_13/7  
hsa-mir-526a-2\_13/7  
hsa-mir-518d\_13/7  
hsa-mir-521-2\_13/7  
hsa-mir-516b-2\_13/7  
hsa-mir-519a-1\_13/7  
hsa-mir-520c\_58902519  
hsa-mir-518a-1\_13/7  
hsa-mir-521-1\_13/7  
hsa-mir-520b\_13/7  
hsa-mir-519e\_13/7  
hsa-mir-518c\_13/7  
hsa-mir-520g\_13/7  
hsa-mir-519d\_13/7  
hsa-mir-520h\_13/7  
hsa-mir-516b-1\_13/7  
hsa-mir-526b\_13/7  
hsa-mir-520d\_13/7  
hsa-mir-516a-2\_13/7  
hsa-mir-524\_13/7  
hsa-mir-520f\_13/7  
hsa-mir-520e\_13/7  
hsa-mir-517a\_13/7  
hsa-mir-517b\_13/7  
hsa-mir-517c\_13/7

hsa-mir-519b\_13/7 2991  
hsa-mir-523\_13/7  
hsa-mir-518a-2\_13/7  
hsa-mir-519c\_13/7  
hsa-mir-525\_13/7  
hsa-mir-518b\_13/7  
hsa-mir-520a\_13/7  
hsa-mir-518f\_13/7  
hsa-mir-522\_13/7  
hsa-mir-526a-1\_13/7  
hsa-mir-518g\_13/7  
hsa-mir-516a-1\_13/7  
hsa-mir-527\_13/7  
hsa-mir-526a-2\_13/7  
hsa-mir-518d\_13/7  
hsa-mir-521-2\_13/7  
hsa-mir-516b-2\_13/7  
hsa-mir-519a-1\_13/7  
hsa-mir-520c\_58902519  
hsa-mir-518a-1\_13/7  
hsa-mir-521-1\_13/7  
hsa-mir-520b\_13/7  
hsa-mir-519e\_13/7  
hsa-mir-518c\_13/7  
hsa-mir-520g\_13/7  
hsa-mir-519d\_13/7  
hsa-mir-520h\_13/7  
hsa-mir-516b-1\_13/7  
hsa-mir-526b\_13/7  
hsa-mir-520d\_13/7  
hsa-mir-516a-2\_13/7  
hsa-mir-524\_13/7  
hsa-mir-520f\_13/7  
hsa-mir-520e\_13/7  
hsa-mir-517a\_13/7  
hsa-mir-517b\_13/7  
hsa-mir-517c\_13/7



3121  
hsa-mir-519b\_13/7  
hsa-mir-523\_13/7  
hsa-mir-5188a-2\_13/7  
hsa-mir-519c\_13/7  
hsa-mir-525\_13/7  
hsa-mir-5185b\_13/7  
hsa-mir-520a\_13/7  
hsa-mir-5181f\_13/7  
hsa-mir-522\_13/7  
hsa-mir-526a-1\_13/7  
hsa-mir-518e\_13/7  
hsa-mir-516a-1\_13/7  
hsa-mir-527\_13/7  
hsa-mir-526a-2\_13/7  
hsa-mir-518d\_13/7  
hsa-mir-521-2\_13/7  
hsa-mir-516b-2\_13/7  
hsa-mir-519a-1\_13/7  
hsa-mir-520c\_58902519  
hsa-mir-518a-1\_13/7  
hsa-mir-521-1\_13/7  
hsa-mir-519a-2\_13/7  
hsa-mir-520b\_13/7  
hsa-mir-519e\_13/7  
hsa-mir-518c\_13/7  
hsa-mir-520g\_13/7  
hsa-mir-519f\_13/7  
hsa-mir-520h\_13/7  
hsa-mir-516b-1\_13/7  
hsa-mir-526b\_13/7  
hsa-mir-520d\_13/7  
hsa-mir-516a-2\_13/7  
hsa-mir-524\_13/7  
hsa-mir-520f\_13/7  
hsa-mir-520e\_13/7  
hsa-mir-517a\_13/7  
hsa-mir-517b\_13/7  
hsa-mir-517c\_13/7

3251  
hsa-mir-519b\_13/7  
hsa-mir-523\_13/7  
hsa-mir-5188a-2\_13/7  
hsa-mir-519c\_13/7  
hsa-mir-520a\_13/7  
hsa-mir-5181f\_13/7  
hsa-mir-522\_13/7  
hsa-mir-526a-1\_13/7  
hsa-mir-518e\_13/7  
hsa-mir-527\_13/7  
hsa-mir-526a-2\_13/7  
hsa-mir-518d\_13/7  
hsa-mir-521-2\_13/7  
hsa-mir-516b-2\_13/7  
hsa-mir-519a-1\_13/7  
hsa-mir-520c\_58902519  
hsa-mir-518a-1\_13/7  
hsa-mir-521-1\_13/7  
hsa-mir-519a-2\_13/7  
hsa-mir-520b\_13/7  
hsa-mir-519e\_13/7  
hsa-mir-518c\_13/7  
hsa-mir-520g\_13/7  
hsa-mir-519f\_13/7  
hsa-mir-520h\_13/7  
hsa-mir-516b-1\_13/7  
hsa-mir-526b\_13/7  
hsa-mir-520d\_13/7  
hsa-mir-516a-2\_13/7  
hsa-mir-524\_13/7  
hsa-mir-520f\_13/7  
hsa-mir-520e\_13/7  
hsa-mir-517a\_13/7  
hsa-mir-517b\_13/7  
hsa-mir-517c\_13/7

3381  
hsa-mir-519b\_13/7  
hsa-mir-523\_13/7  
hsa-mir-5188a-2\_13/7  
hsa-mir-519c\_13/7  
hsa-mir-525\_13/7  
hsa-mir-5185b\_13/7  
hsa-mir-520a\_13/7  
hsa-mir-5181f\_13/7  
hsa-mir-522\_13/7  
hsa-mir-526a-1\_13/7  
hsa-mir-518e\_13/7  
hsa-mir-527\_13/7  
hsa-mir-526a-2\_13/7  
hsa-mir-518d\_13/7  
hsa-mir-521-2\_13/7  
hsa-mir-516b-2\_13/7  
hsa-mir-519a-1\_13/7  
hsa-mir-520c\_58902519  
hsa-mir-518a-1\_13/7  
hsa-mir-521-1\_13/7  
hsa-mir-519a-2\_13/7  
hsa-mir-520b\_13/7  
hsa-mir-519e\_13/7  
hsa-mir-518c\_13/7  
hsa-mir-520g\_13/7  
hsa-mir-519f\_13/7  
hsa-mir-520h\_13/7  
hsa-mir-516b-1\_13/7  
hsa-mir-526b\_13/7  
hsa-mir-520d\_13/7  
hsa-mir-516a-2\_13/7  
hsa-mir-524\_13/7  
hsa-mir-520f\_13/7  
hsa-mir-520e\_13/7  
hsa-mir-517a\_13/7  
hsa-mir-517b\_13/7  
hsa-mir-517c\_13/7

3511  
hsa-mir-519b\_13/7  
hsa-mir-523\_13/7  
hsa-mir-518a-2\_13/7  
hsa-mir-519c\_13/7  
hsa-mir-525\_13/7  
hsa-mir-518b\_13/7  
hsa-mir-520a\_13/7  
hsa-mir-518f\_13/7  
hsa-mir-522\_13/7  
hsa-mir-526a-1\_13/7  
hsa-mir-518e\_13/7  
hsa-mir-516a-1\_13/7  
hsa-mir-527\_13/7  
hsa-mir-526a-2\_13/7  
hsa-mir-518d\_13/7  
hsa-mir-521-2\_13/7  
hsa-mir-516b-2\_13/7  
hsa-mir-519a-1\_13/7  
hsa-mir-520c\_58902519  
hsa-mir-518a-1\_13/7  
hsa-mir-521-1\_13/7  
hsa-mir-519a-2\_13/7  
hsa-mir-520b\_13/7  
hsa-mir-519e\_13/7  
hsa-mir-518c\_13/7  
hsa-mir-520g\_13/7  
hsa-mir-519f\_13/7  
hsa-mir-520h\_13/7  
hsa-mir-516b-1\_13/7  
hsa-mir-526b\_13/7  
hsa-mir-520l\_13/7  
hsa-mir-516a-2\_13/7  
hsa-mir-524\_13/7  
hsa-mir-520f\_13/7  
hsa-mir-520e\_13/7  
hsa-mir-517a\_13/7  
hsa-mir-517b\_13/7  
hsa-mir-517c\_13/7

3641  
hsa-mir-519b\_13/7  
hsa-mir-523\_13/7  
hsa-mir-518a-2\_13/7  
hsa-mir-519c\_13/7  
hsa-mir-525\_13/7  
hsa-mir-518b\_13/7  
hsa-mir-520a\_13/7  
hsa-mir-518f\_13/7  
hsa-mir-522\_13/7  
hsa-mir-526a-1\_13/7  
hsa-mir-518e\_13/7  
hsa-mir-516a-1\_13/7  
hsa-mir-527\_13/7  
hsa-mir-526a-2\_13/7  
hsa-mir-518d\_13/7  
hsa-mir-521-2\_13/7  
hsa-mir-516b-2\_13/7  
hsa-mir-519a-1\_13/7  
hsa-mir-520c\_58902519  
hsa-mir-518a-1\_13/7  
hsa-mir-521-1\_13/7  
hsa-mir-519a-2\_13/7  
hsa-mir-520b\_13/7  
hsa-mir-519e\_13/7  
hsa-mir-518c\_13/7  
hsa-mir-520g\_13/7  
hsa-mir-519f\_13/7  
hsa-mir-520h\_13/7  
hsa-mir-516b-1\_13/7  
hsa-mir-526b\_13/7  
hsa-mir-520l\_13/7  
hsa-mir-516a-2\_13/7  
hsa-mir-524\_13/7  
hsa-mir-520f\_13/7  
hsa-mir-520e\_13/7  
hsa-mir-517a\_13/7  
hsa-mir-517b\_13/7  
hsa-mir-517c\_13/7

3771  
hsa-mir-519b\_13/7  
hsa-mir-523\_13/7  
hsa-mir-518a-2\_13/7  
hsa-mir-519c\_13/7  
hsa-mir-525\_13/7  
hsa-mir-518b\_13/7  
hsa-mir-520a\_13/7  
hsa-mir-518f\_13/7  
hsa-mir-522\_13/7  
hsa-mir-526a-1\_13/7  
hsa-mir-518e\_13/7  
hsa-mir-516a-1\_13/7  
hsa-mir-527\_13/7  
hsa-mir-526a-2\_13/7  
hsa-mir-518d\_13/7  
hsa-mir-521-2\_13/7  
hsa-mir-516b-2\_13/7  
hsa-mir-519a-1\_13/7  
hsa-mir-520c\_58902519  
hsa-mir-518a-1\_13/7  
hsa-mir-521-1\_13/7  
hsa-mir-519a-2\_13/7  
hsa-mir-520b\_13/7  
hsa-mir-519e\_13/7  
hsa-mir-518c\_13/7  
hsa-mir-520g\_13/7  
hsa-mir-519f\_13/7  
hsa-mir-520h\_13/7  
hsa-mir-516b-1\_13/7  
hsa-mir-526b\_13/7  
hsa-mir-520l\_13/7  
hsa-mir-516a-2\_13/7  
hsa-mir-524\_13/7  
hsa-mir-520f\_13/7  
hsa-mir-520e\_13/7  
hsa-mir-517a\_13/7  
hsa-mir-517b\_13/7  
hsa-mir-517c\_13/7

3901  
hsa-mir-519b\_13/7  
hsa-mir-523\_13/7  
hsa-mir-518a-2\_13/7  
hsa-mir-519c\_13/7  
hsa-mir-525\_13/7  
hsa-mir-518b\_13/7  
hsa-mir-520a\_13/7  
hsa-mir-518f\_13/7  
hsa-mir-522\_13/7  
hsa-mir-526a-1\_13/7  
hsa-mir-518e\_13/7  
hsa-mir-516a-1\_13/7  
hsa-mir-527\_13/7  
hsa-mir-526a-2\_13/7  
hsa-mir-518d\_13/7  
hsa-mir-521-2\_13/7  
hsa-mir-516b-2\_13/7  
hsa-mir-519a-1\_13/7  
hsa-mir-520c\_58902519  
hsa-mir-518a-1\_13/7  
hsa-mir-521-1\_13/7  
hsa-mir-519a-2\_13/7  
hsa-mir-520b\_13/7  
hsa-mir-519e\_13/7  
hsa-mir-518c\_13/7  
hsa-mir-520g\_13/7  
hsa-mir-519f\_13/7  
hsa-mir-520h\_13/7  
hsa-mir-516b-1\_13/7  
hsa-mir-526b\_13/7  
hsa-mir-520d\_13/7  
hsa-mir-516a-2\_13/7  
hsa-mir-524\_13/7  
hsa-mir-520f\_13/7  
hsa-mir-520e\_13/7  
hsa-mir-517a\_13/7  
hsa-mir-517b\_13/7  
hsa-mir-517c\_13/7

4031  
hsa-mir-519b\_13/7  
hsa-mir-523\_13/7  
hsa-mir-518a-2\_13/7  
hsa-mir-519c\_13/7  
hsa-mir-525\_13/7  
hsa-mir-518b\_13/7  
hsa-mir-520a\_13/7  
hsa-mir-518f\_13/7  
hsa-mir-522\_13/7  
hsa-mir-526a-1\_13/7  
hsa-mir-518e\_13/7  
hsa-mir-516a-1\_13/7  
hsa-mir-527\_13/7  
hsa-mir-526a-2\_13/7  
hsa-mir-518d\_13/7  
hsa-mir-521-2\_13/7  
hsa-mir-516b-2\_13/7  
hsa-mir-519a-1\_13/7  
hsa-mir-520c\_58902519  
hsa-mir-518a-1\_13/7  
hsa-mir-521-1\_13/7  
hsa-mir-519a-2\_13/7  
hsa-mir-520b\_13/7  
hsa-mir-519e\_13/7  
hsa-mir-518c\_13/7  
hsa-mir-520g\_13/7  
hsa-mir-519f\_13/7  
hsa-mir-520h\_13/7  
hsa-mir-516b-1\_13/7  
hsa-mir-526b\_13/7  
hsa-mir-520d\_13/7  
hsa-mir-516a-2\_13/7  
hsa-mir-524\_13/7  
hsa-mir-520f\_13/7  
hsa-mir-520e\_13/7  
hsa-mir-517a\_13/7  
hsa-mir-517b\_13/7  
hsa-mir-517c\_13/7
